# Supplementary material for: Physical drivers and trends of the recent delayed withdrawal of the Southwest Monsoon over Mainland Indochina
Source: Copernicus journal article supplement (doi:10.5194/egusphere-2025-1159), 2025-04-16
Supplement: Supplementary file 1 [file egusphere-2025-1159-supplement.pdf]

Table S-1 MSwM Onset and Withdrawal dates (day of a year) compared to each parameter's MSwM index

|                   | $\Delta P$ | $\Delta U$ | MFC | TpNet | OLR | Mean         | DMH(MEAN)    |
|-------------------|------------|------------|-----|-------|-----|--------------|--------------|
| <b>Onset</b>      | 135        | 139        | 136 | 132   | 135 | 135 (14-May) | 139 (17-May) |
| <b>Withdrawal</b> | 273        | 271        | 289 | 267   | 291 | 278 (4-Oct)  | 276 (1-Oct)  |
| <b>Length</b>     | 139        | 133        | 154 | 136   | 158 | 144          | 138          |

Table S-2 MSwM indices results of large-scale it onset, withdrawal, and season length.

|                 | Mean                | Standard<br>Deviation | Maximum            | Minimum             |
|-----------------|---------------------|-----------------------|--------------------|---------------------|
| Onset Date      | <i>135 (14-May)</i> | <i>5</i>              | <i>153 (1-Jun)</i> | <i>120 (29-Apr)</i> |
| Withdrawal Date | <i>278 (4-OCT)</i>  | <i>13</i>             | <i>306 (1-Nov)</i> | <i>255 (11-Sep)</i> |
| Season Length   | <i>144</i>          | <i>14</i>             | <i>168</i>         | <i>117</i>          |

Table S-3 – Correlation values of parameters between variables

|               | dP               | U-Wind         | MFC            | OLR                |
|---------------|------------------|----------------|----------------|--------------------|
| <b>TP Net</b> | 0.81<br>(P<0.01) | 0.8.2 (P<0.01) | 0.8.0 (P<0.01) | -<br>(P<0.01) 0.80 |

Table S-4 Yearly onset and withdrawal dates, season length of southwest monsoon over the Myanmar as determine by the MSwM index and that extracted from DMH, Myanmar

| Year | Onset |     | Withdrawal |     | Season Length |     |
|------|-------|-----|------------|-----|---------------|-----|
|      | MSwM  | DMH | MSwM       | DMH | MSwM          | DMH |
| 1991 | 151   | 146 | 272        | 270 | 122           | 125 |
| 1992 | 135   | 137 | 265        | 275 | 130           | 139 |
| 1993 | 134   | 140 | 275        | 285 | 142           | 146 |
| 1994 | 144   | 133 | 279        | 276 | 136           | 144 |

|      |     |     |     |     |     |     |
|------|-----|-----|-----|-----|-----|-----|
| 1995 | 132 | 135 | 273 | 276 | 142 | 142 |
| 1996 | 127 | 144 | 260 | 276 | 134 | 133 |
| 1997 | 132 | 143 | 278 | 251 | 148 | 109 |
| 1998 | 137 | 141 | 274 | 268 | 139 | 128 |
| 1999 | 138 | 130 | 282 | 273 | 145 | 144 |
| 2000 | 130 | 134 | 276 | 265 | 147 | 132 |
| 2001 | 122 | 140 | 265 | 275 | 144 | 136 |
| 2002 | 129 | 147 | 271 | 273 | 143 | 127 |
| 2003 | 131 | 137 | 277 | 268 | 147 | 132 |
| 2004 | 129 | 133 | 273 | 266 | 144 | 134 |
| 2005 | 145 | 143 | 276 | 249 | 132 | 107 |
| 2006 | 134 | 137 | 283 | 274 | 150 | 138 |
| 2007 | 125 | 134 | 286 | 282 | 162 | 149 |
| 2008 | 128 | 132 | 277 | 275 | 150 | 144 |
| 2009 | 138 | 137 | 286 | 281 | 149 | 145 |
| 2010 | 138 | 139 | 278 | 272 | 141 | 134 |
| 2011 | 140 | 142 | 280 | 283 | 141 | 142 |
| 2012 | 130 | 139 | 280 | 285 | 151 | 147 |
| 2013 | 136 | 137 | 275 | 286 | 141 | 150 |
| 2014 | 131 | 138 | 274 | 287 | 144 | 150 |
| 2015 | 134 | 137 | 285 | 286 | 152 | 150 |
| 2016 | 137 | 141 | 291 | 287 | 155 | 147 |
| 2017 | 150 | 136 | 299 | 286 | 150 | 151 |
| 2018 | 141 | 145 | 283 | 278 | 143 | 134 |
| 2019 | 137 | 144 | 273 | 270 | 137 | 127 |
| 2020 | 142 | 140 | 297 | 292 | 156 | 153 |

**Table S-5 List of Abbreviations**

|       |   |                                                    |
|-------|---|----------------------------------------------------|
| MSwM  | - | Mainland Indochina Southwest Monsoon               |
| CPM   | - | Cumulative Change Point Monsoon Index              |
| SST   | - | sea surface temperature                            |
| SWJ   | - | Subtropical Westerly jet                           |
| TEJ   | - | Tropical Easterly jet                              |
| EASM  | - | East Asian summer monsoon                          |
| ISM   | - | Indian summer monsoon                              |
| WNPSM | - | Western North Pacific summer monsoon               |
| MIC   | - | mainland-Indochina                                 |
| ENSO  | - | El Niño Southern Oscillation                       |
| DMH   | - | Department of Meteorology and Hydrology            |
| ECMWF | - | European Centre for Medium-Range Weather Forecasts |

- MFC - moisture flux convergence
- SLP - sea level pressure
- OLR - outgoing longwave radiation
- HadISST - Hadley Centre Sea Surface Temperature
- IOD - Indian Ocean dipole

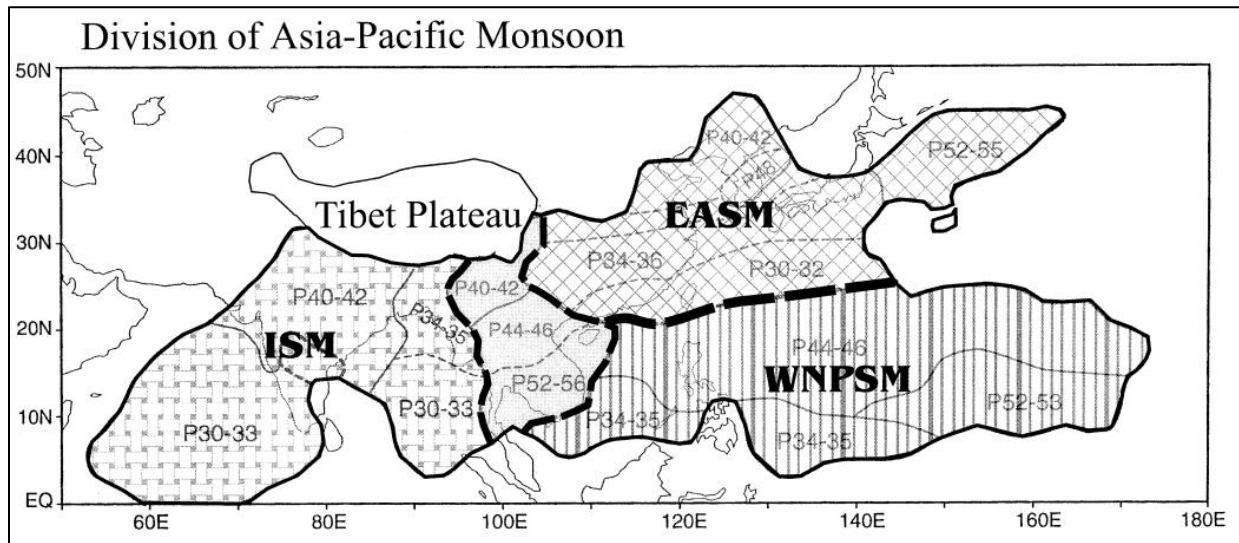

Fig S-1 Three subregions make up the Asian-Pacific monsoon (B. Wang & Ho, 2002)

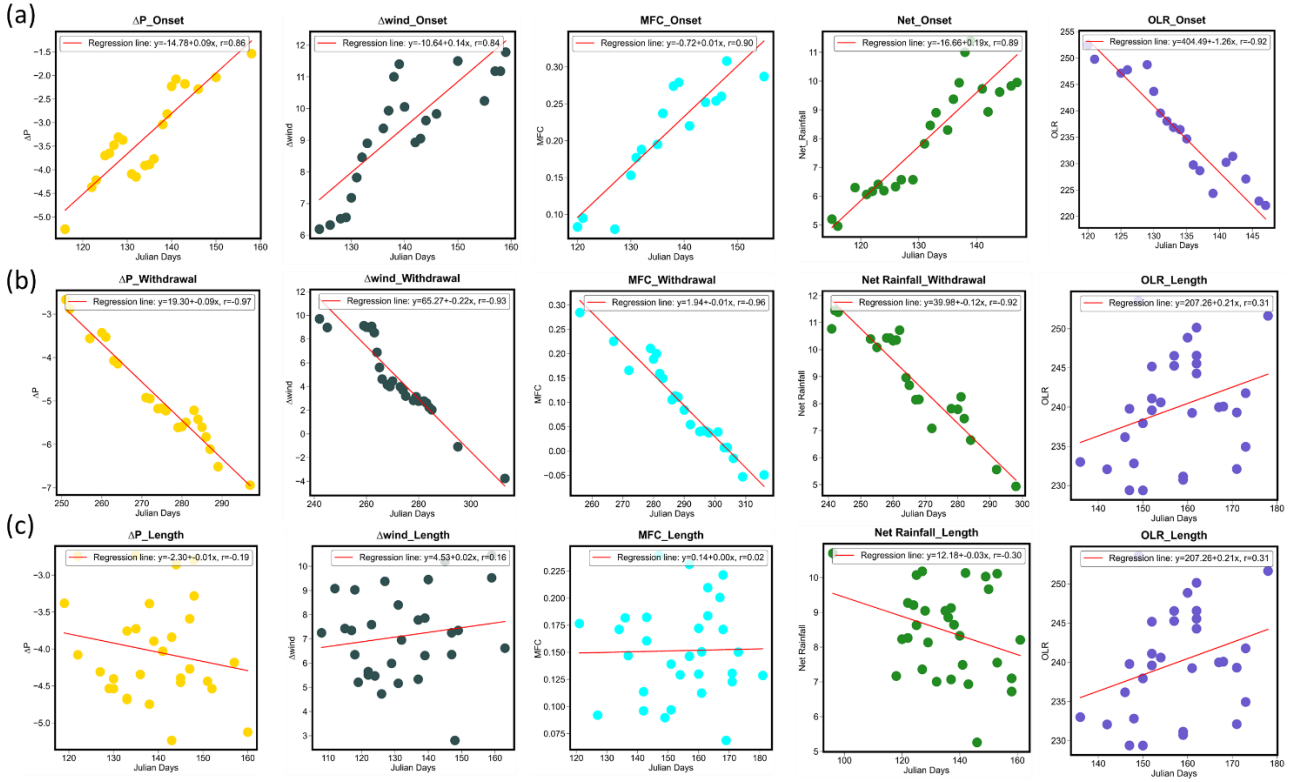

Fig S-2 Regression scatter plots of five variables of MSwM index (as in Eq.2) with monsoon (a) onset dates, (b) withdrawal dates and (c) season length during 1991-2020. This figure was created with Python 3.10 (Matplotlib 3.5.2 [<https://matplotlib.org/>]).

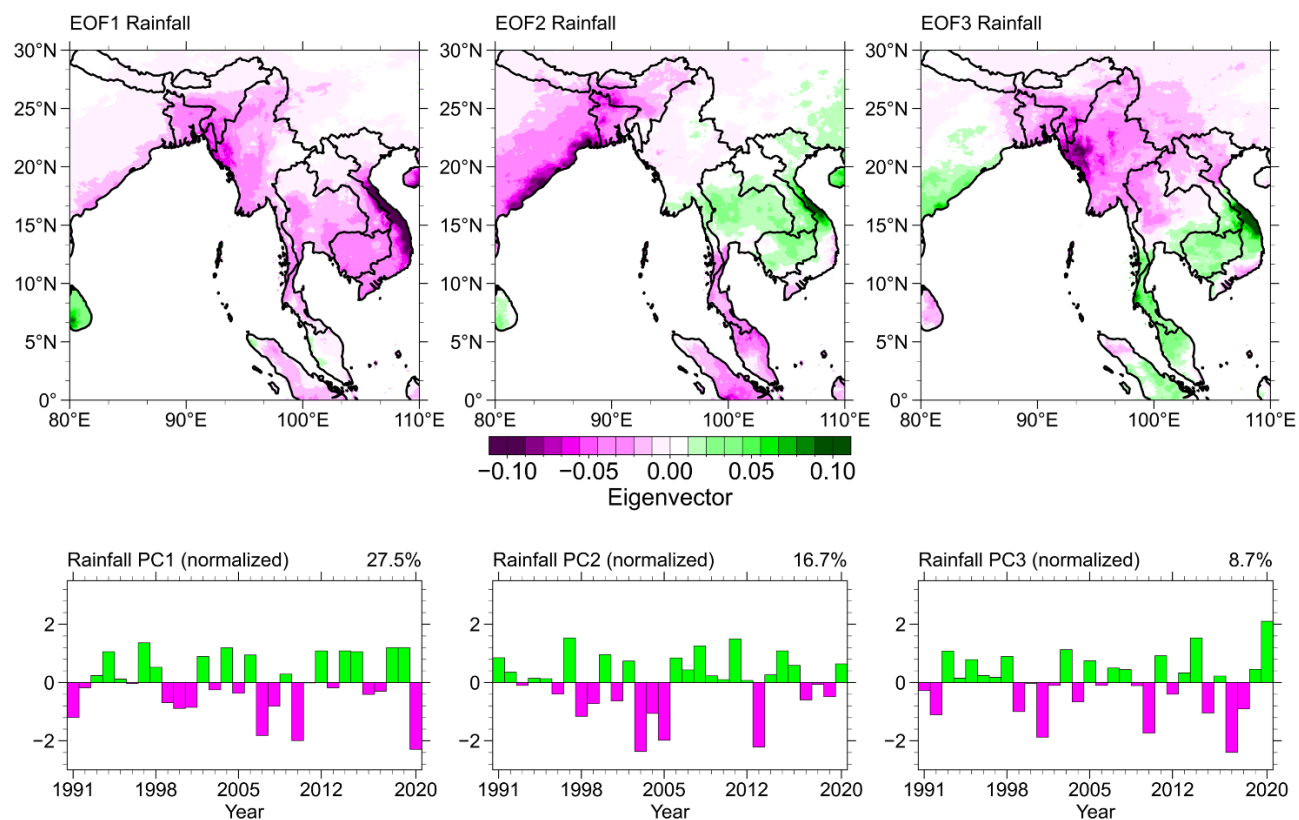

**Fig S-3** First three EOF modes of October rainfall and their normalized PCs over the study area, with a focus on rainfall variability in mainland Indochina. This figure was created with Python 3.10 (Matplotlib 3.5.2 <https://matplotlib.org/>, Cartopy 0.20.0 <https://pypi.org/project/Cartopy/>).

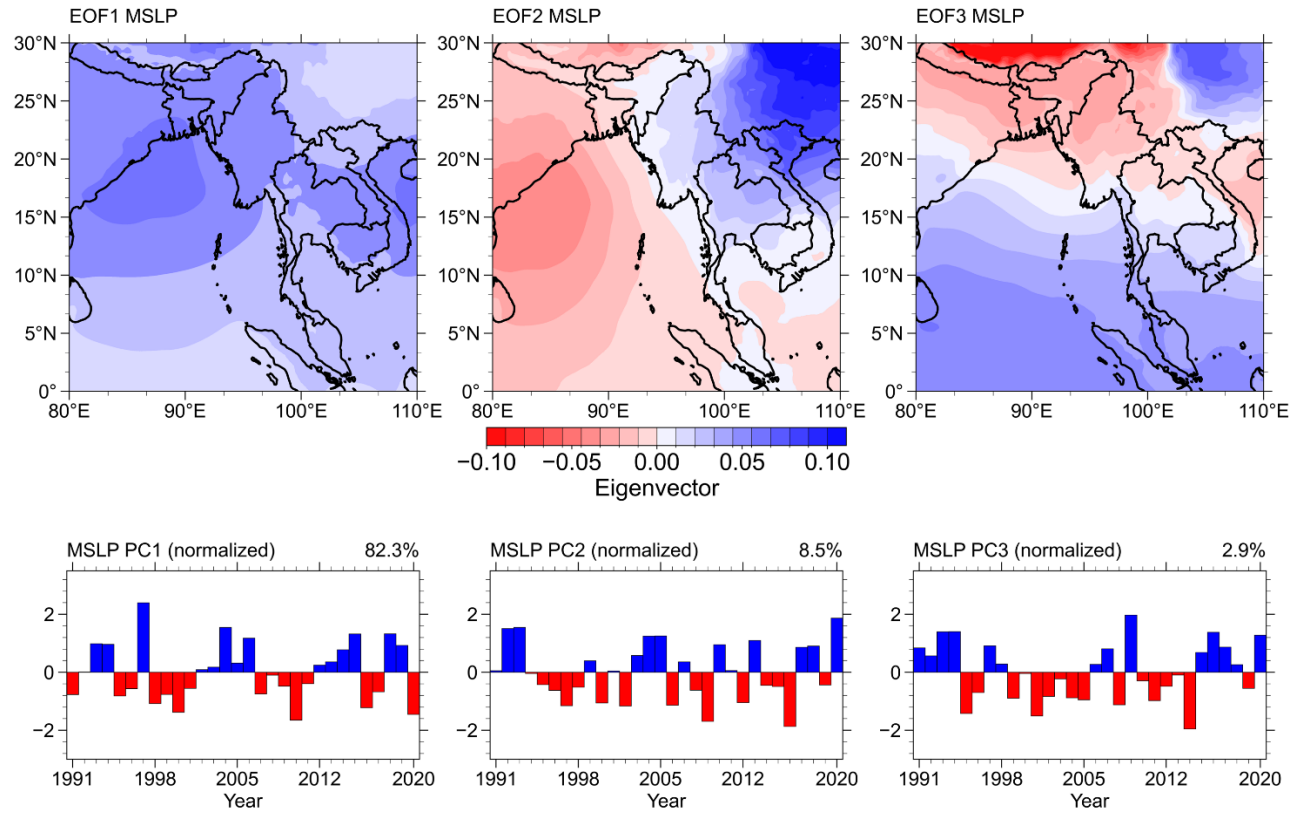

**Fig S-4** First three EOF modes of October sea level pressure and their normalized PCs over the study area, focusing on atmospheric circulation variability in mainland Indochina. This figure was created with Python 3.10 (Matplotlib 3.5.2 [<https://matplotlib.org/>], Cartopy 0.20.0 [<https://pypi.org/project/Cartopy/>]).



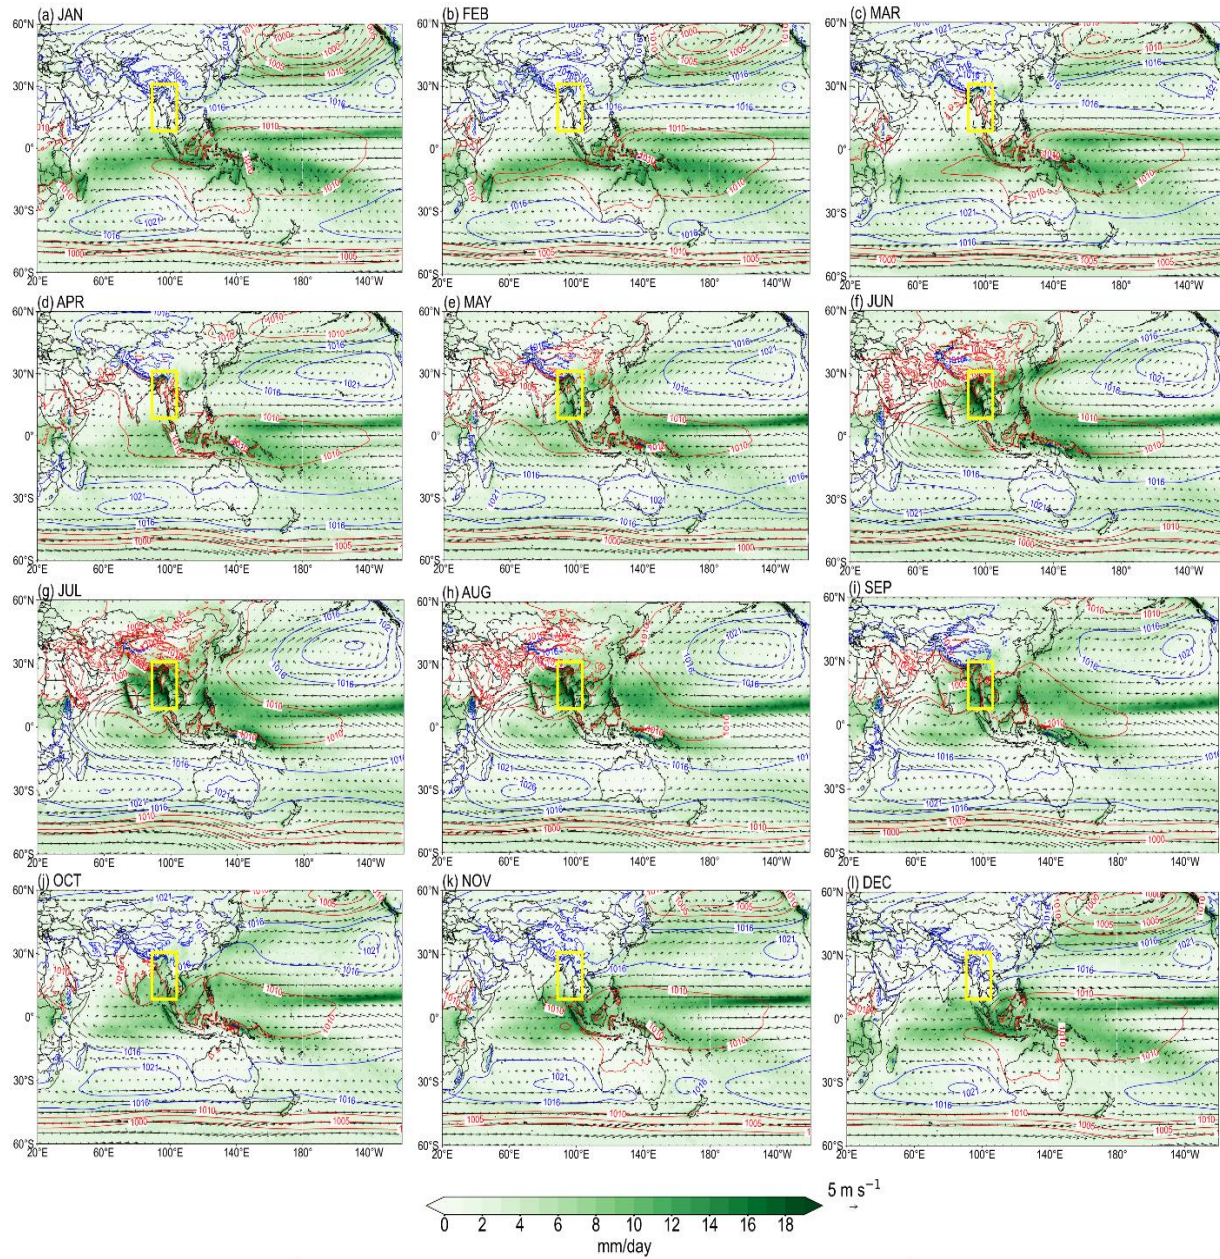

Fig S-5 Climatology intraseasonal variation of rainfall (shade, mm), 850 hPa wind (vector, m/s) and geopotential (contour, gpm). This figure was created with Python 3.10 (Matplotlib 3.5.2 [<https://matplotlib.org/>], Cartopy 0.20.0 [<https://pypi.org/project/Cartopy/>]).



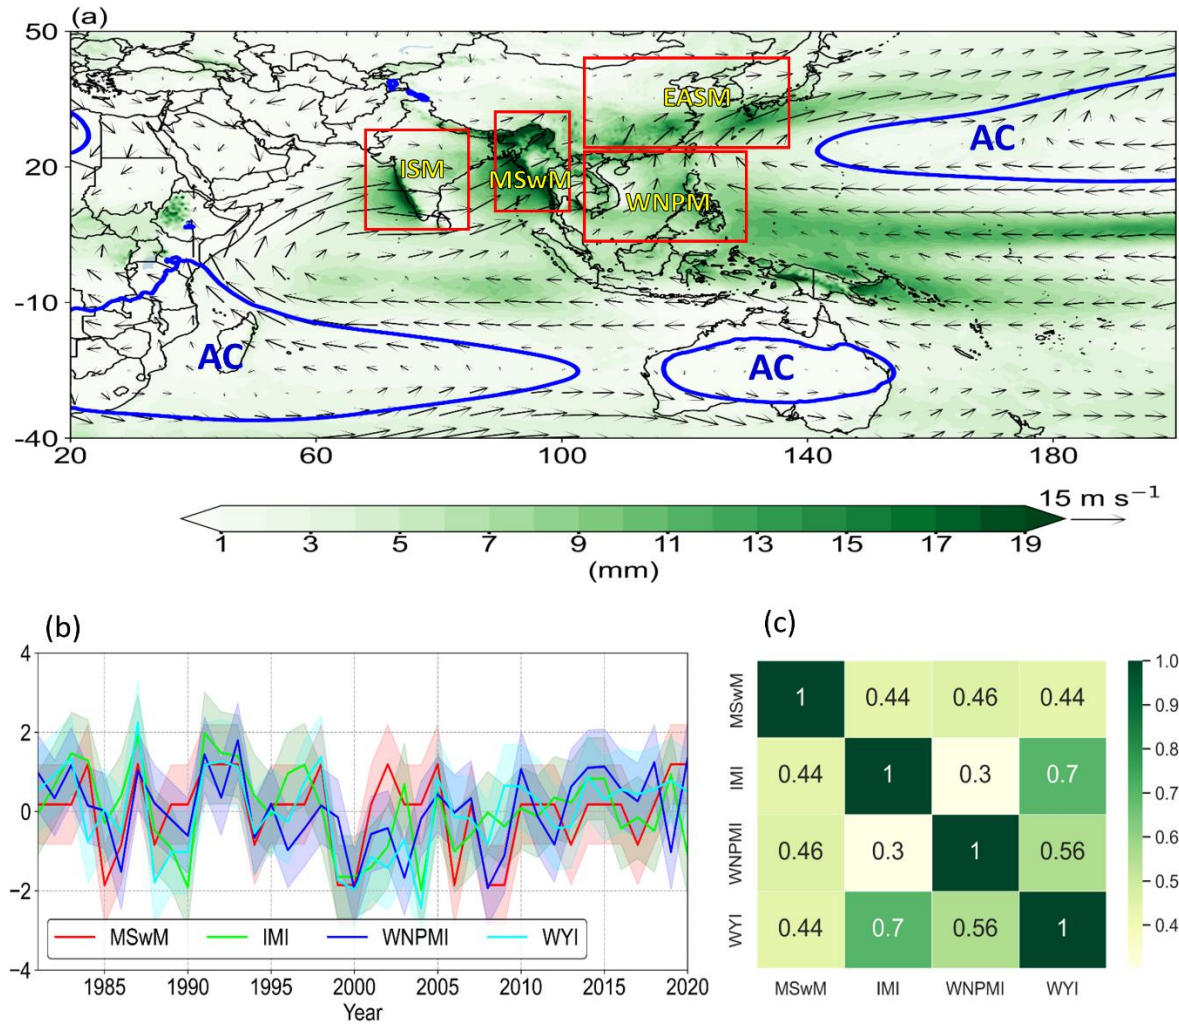

**Fig S-6 Four sub-regions of Asian-Pacific monsoon adopted from (Wang & Ho, 2002).** ISM, MSWM, and WNPSM are tropical monsoon regions and the subtropical monsoon, EASM by shaded daily rainfall (mm/day) with 850 hPa level wind (m/s) and 15000-gpm geopotential contour blue line. (b) Annual time series of indices and (c) their correlation heatmap. This figure was created with Python 3.10 (Matplotlib 3.5.2 [<https://matplotlib.org/>], Cartopy 0.20.0 [<https://pypi.org/project/Cartopy/>]).



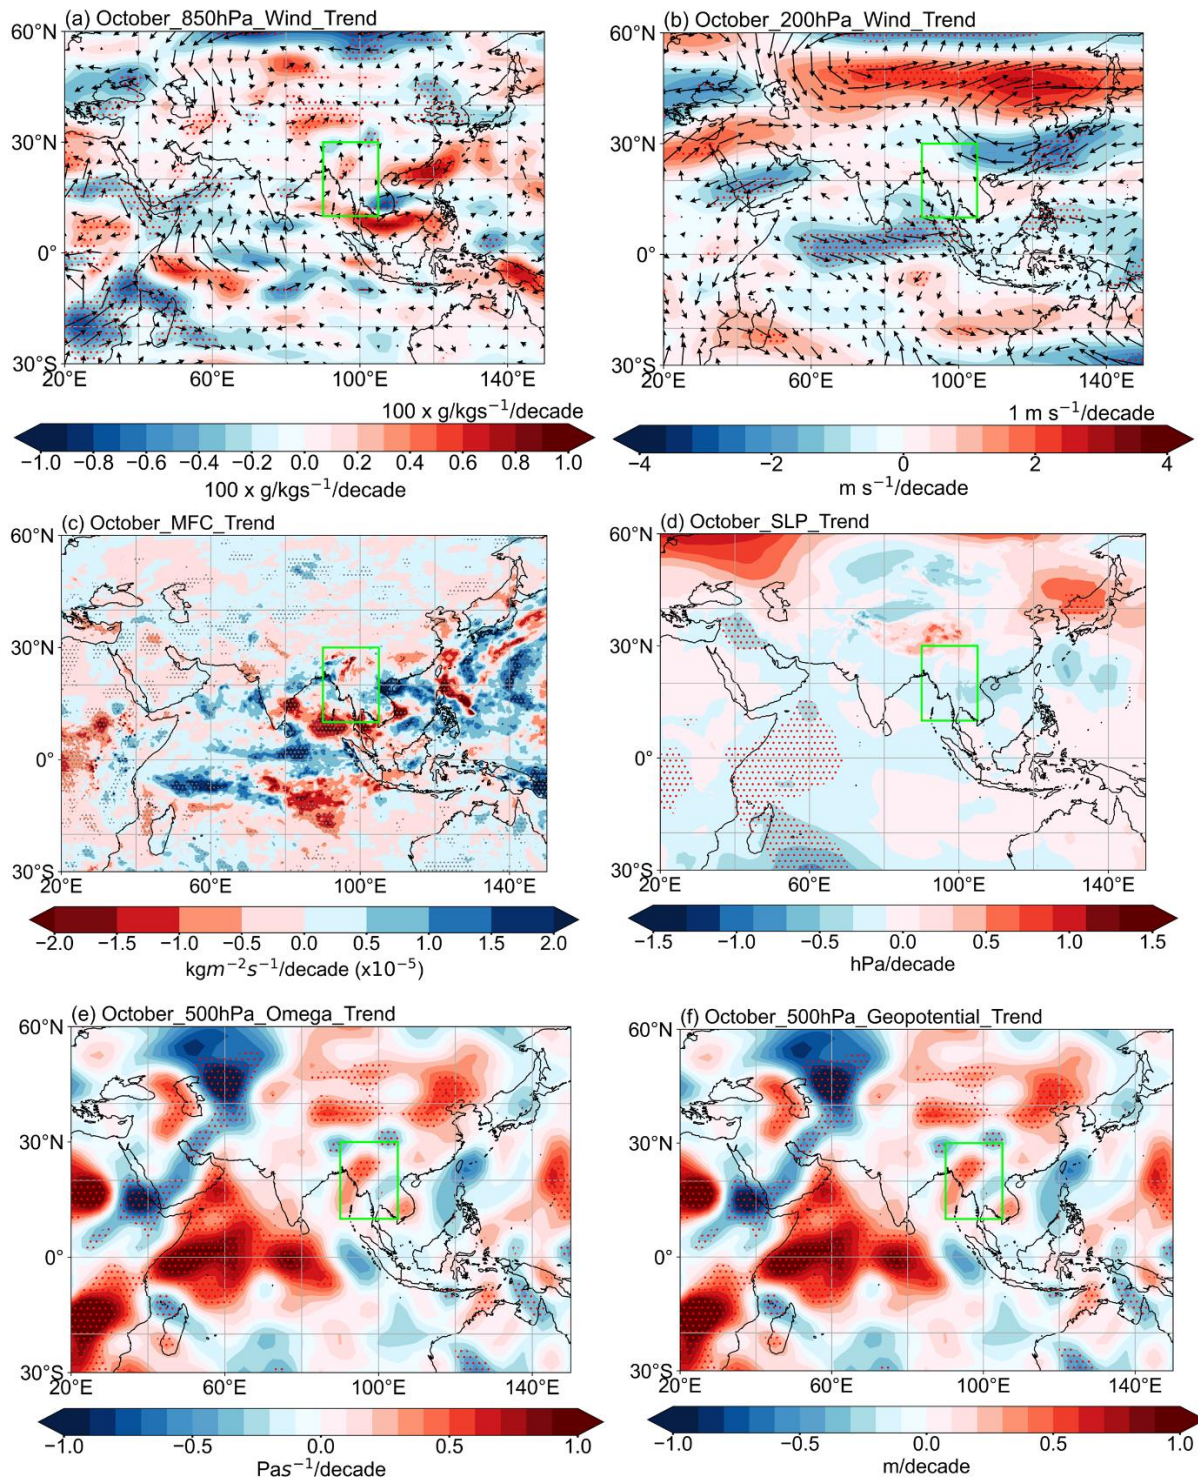

**Fig S-7 Spatial trend analysis of October (a) 850 hPa wind, (b) 200 hPa wind, (c) MFC, (d) SLP, (e) 500 hPa Omega, and (f) 500 hPa geopotential, illustrating evolving atmospheric dynamics over mainland Indochina. This figure was created with Python 3.10 (Matplotlib 3.5.2 [<https://matplotlib.org/>], Cartopy 0.20.0 [<https://pypi.org/project/Cartopy/>]).**

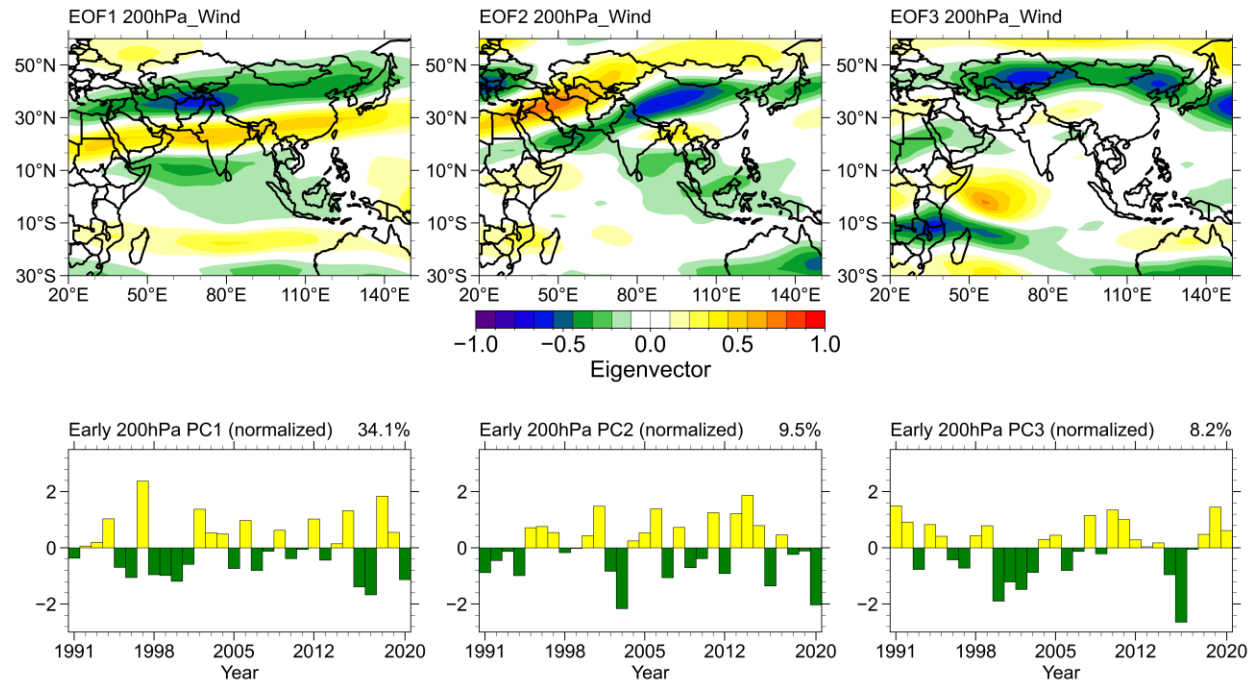

Fig S-8 First 3 EOF modes pf 200 hPa wind over mainland Indochina with their normalize timeseries. This figure was created with Python 3.10 (Matplotlib 3.5.2 <https://matplotlib.org/>, Cartopy 0.20.0 <https://pypi.org/project/Cartopy/>).



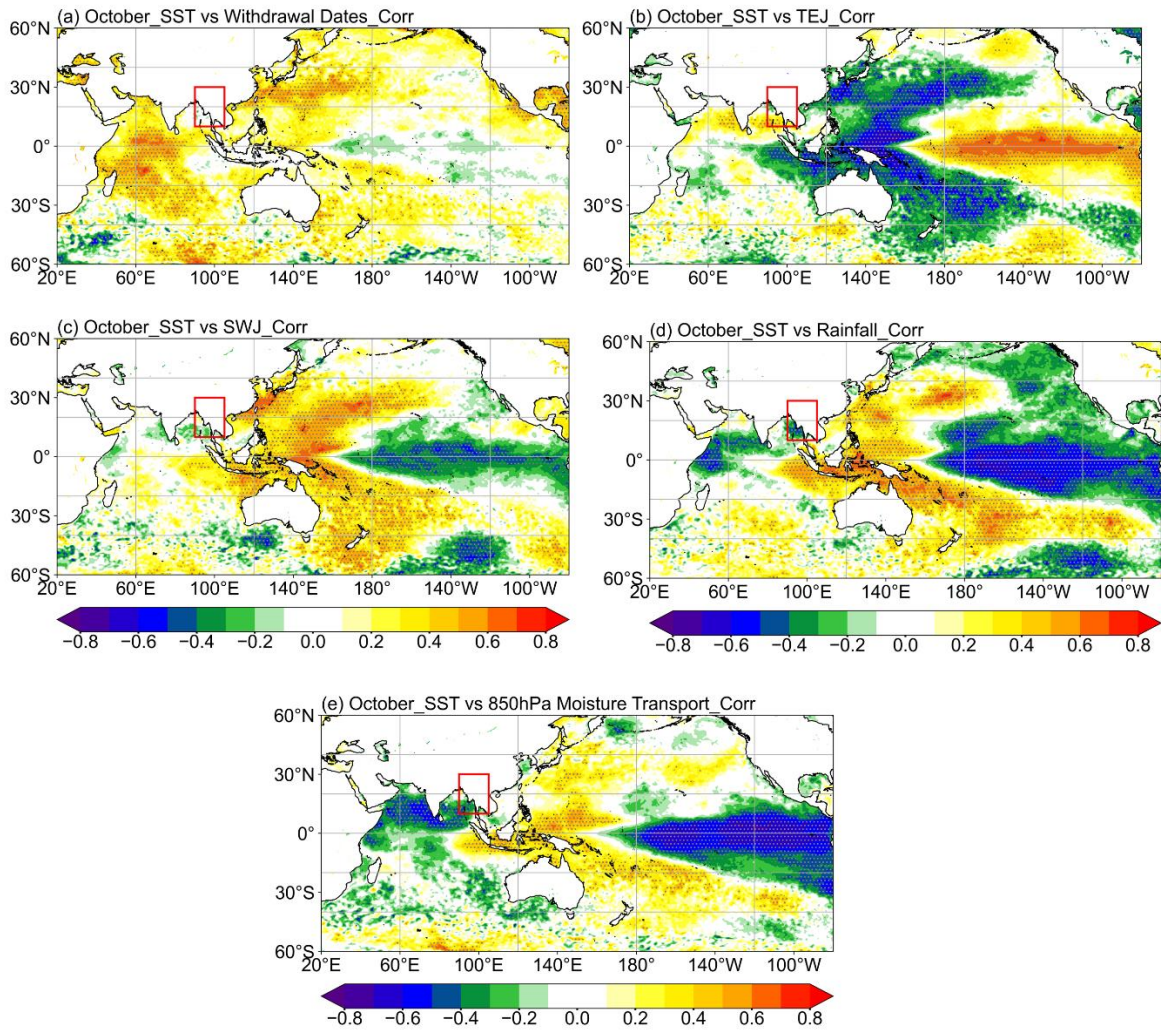

Fig S-9 Correlation between Aug-Sep sea surface temperatures (SSTs) and (a) MSWM withdrawal dates, (b) October tropical easterly jet, (c) October sub-tropical westerly jet, (d) October rainfall over MIC and (e) October 850hPa moisture divergent. Dotted hatches mean 95% confident area by t-test statically. This figure was created with Python 3.10 (Matplotlib 3.5.2 [<https://matplotlib.org/>], Cartopy 0.20.0 [<https://pypi.org/project/Cartopy/>]).
